# Supplementary material for: CTP sensing and Mec1ATR-Rad53CHK1/CHK2 mediate a two-layered response to inhibition of glutamine metabolism
Source: PLoS Genet. 2022 Mar 3;18(3):e1010101. doi: 10.1371/journal.pgen.1010101 (PMC8923462; doi:10.1371/journal.pgen.1010101)
Supplement: S2 Table — (XLSX) [file pgen.1010101.s005.xlsx]

## Sheet: S2 Table
S2 Table. Validation of yeast knock-out library colony sizes on YPD and YPD + DON after crossing with a wt query
allele	ORF	SGD gene	SGD description	BH-adjusted p value	direction	N (DON)	N (Untreated)	Mean colony size (DON)	Mean colony size (Untreated)	Difference of mean colony sizes (DON - Untreated)	Difference of mean colony sizes - 2x sum of standard deviations (for significance selection)	Difference of mean colony sizes with multiplicative correction for standard deviations (for plotting)
yjr103wΔ	YJR103W	URA8	Minor CTP synthase isozyme (see also URA7); catalyzes the ATP-dependent transfer of the amide nitrogen from glutamine to UTP, forming CTP, the final step in de novo biosynthesis of pyrimidines; involved in phospholipid biosynthesis; capable of forming cytoplasmic filaments termed cytoophidium, especially during conditions of glucose depletion; URA8 has a paralog, URA7, that arose from the whole g…	1.69305e-10	down	8	8	-0.75394	0.0465943	-0.800535	-0.694218	-0.706682
yol067cΔ	YOL067C	RTG1	Transcription factor (bHLH) involved in interorganelle communication; contributes to communication between mitochondria, peroxisomes, and nucleus; target of Hog1p; activated in stochastic pulses of nuclear localization	5.26776e-09	down	8	8	-0.598832	-0.0850694	-0.513763	-0.303904	-0.364765
ycr027cΔ	YCR027C	RHB1	Putative Rheb-related GTPase; involved in regulating canavanine resistance and arginine uptake; member of the Ras superfamily of G-proteins	1.68136e-12	down	7	8	-0.454576	-0.00806685	-0.446509	-0.346348	-0.364699
ydr399wΔ	YDR399W	HPT1	Dimeric hypoxanthine-guanine phosphoribosyltransferase; catalyzes the transfer of the phosphoribosyl portion of 5-phosphoribosyl-alpha-1-pyrophosphate to a purine base (either guanine or hypoxanthine) to form pyrophosphate and a purine nucleotide (either guanosine monophosphate or inosine monophosphate); mutations in the human homolog HPRT1 can cause Lesch-Nyhan syndrome and Kelley-Seegmiller syn…	9.27682e-08	down	8	8	-0.39724	-0.0468622	-0.350378	-0.193315	-0.241929
ydr293cΔ	YDR293C	SSD1	Translational repressor with a role in polar growth and wall integrity; regulated by Cbk1p phosphorylation to effect bud-specific translational control and localization of specific mRNAs; interacts with TOR pathway components; contains a functional N-terminal nuclear localization sequence and nucleocytoplasmic shuttling appears to be critical to Ssd1p function	7.79363e-10	down	8	8	0.0368218	0.266478	-0.229656	-0.121289	-0.156031
ydl173wΔ	YDL173W	PAR32	Protein of unknown function; hyperphosphorylated upon rapamycin treatment in a Tap42p-dependent manner; green fluorescent protein (GFP)-fusion protein localizes to the cytoplasm; PAR32 is not an essential gene	0.000111018	down	8	8	-0.257339	-0.0754609	-0.181878	-0.0129921	-0.0943074
ylr242cΔ	YLR242C	ARV1	Cortical ER protein; implicated in the membrane insertion of tail-anchored C-terminal single transmembrane domain proteins; may function in transport of glycosylphosphatidylinositol intermediates into the ER lumen; required for normal intracellular sterol distribution; human ARV1, required for normal cholesterol and bile acid homeostasis, can complement yeast arv1 null mutant; human variant causi…	0.273446	ns	8	8	0.0309315	0.00241199	0.0285195	0	0.00380656
ycl025cΔ	YCL025C	AGP1	Low-affinity amino acid permease with broad substrate range; involved in uptake of asparagine, glutamine, and other amino acids; expression regulated by SPS plasma membrane amino acid sensor system (Ssy1p-Ptr3p-Ssy5p); AGP1 has a paralog, GNP1, that arose from the whole genome duplication	0.0358569	ns	8	8	0.0111144	-0.051473	0.0625874	0	0.0156432
ybr061cΔ	YBR061C	TRM7	2'-O-ribose methyltransferase; methylates the 2'-O-ribose of tRNA-Phe, tRNA-Trp, and tRNA-Leu at positions C32 and N34 of tRNA anticodon loop; crucial biological role likely modification of tRNA-Phe; interacts with Trm732p and Rtt10p in 2'-O-methylation of C32 and N34 substrate tRNAs, respectively; yeast null mutant can be functionally complemented by human FTSJ1, mutations in which have been imp…	0.00158856	ns	7	8	0.0344855	-0.0250404	0.059526	0	0.0215723
ybl042cΔ	YBL042C	FUI1	High affinity uridine permease, localizes to the plasma membrane; also mediates low but significant transport of the cytotoxic nucleoside analog 5-fluorouridine; not involved in uracil transport; relative distribution to the vacuole increases upon DNA replication stress	4.37021e-05	up	8	8	-0.201563	-0.305877	0.104314	0	0.0465359
